# Supplementary material
Source: Springer Nature journal article supplement (https://www.springermedizin.de/resource/supplementary/12913_2012_2282_MOESM2_ESM.pdf/9530284)

A.

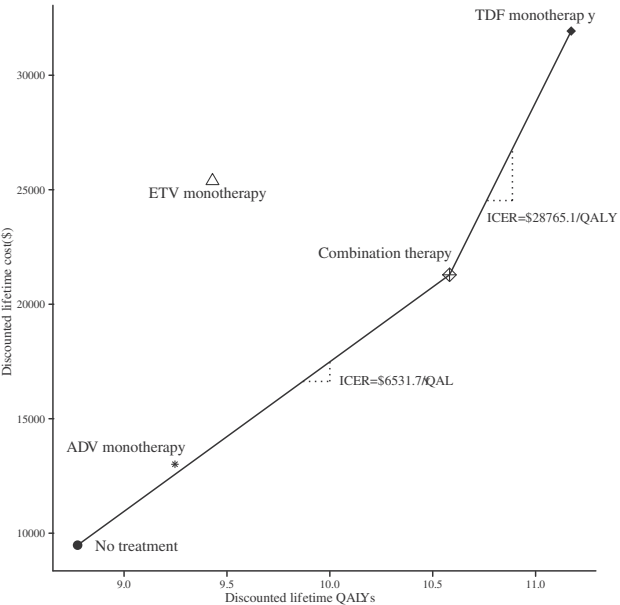

B.

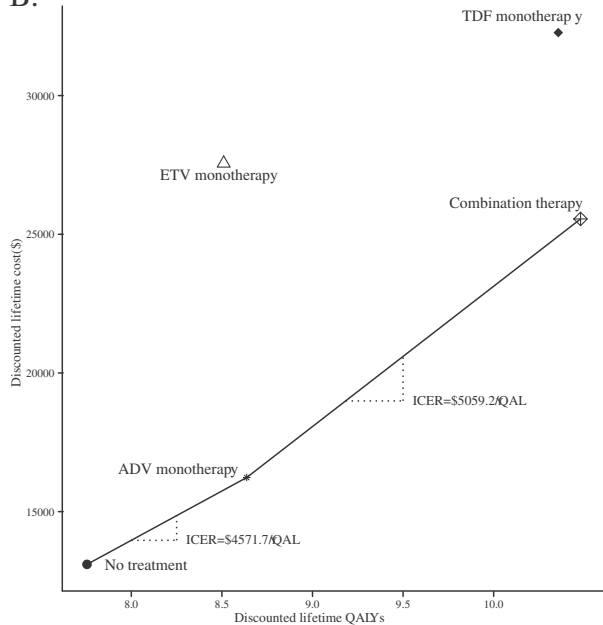

Supplement: MOESM2 [file 9530284]
